# Supplementary material
Source: publisher figshare collection journal article supplement (https://sage.figshare.com/ndownloader/files/23375036)
Supplement: Supplementary file 1 [file 23375036]

Psychological Bulletin Editorial Guidelines

| Section                | Item                                    | Item description                                                                                                                                                                                                        | Rosenthal, 1995 | Cooper, 2003 | Albarracin, 2015                                                                            |
|------------------------|-----------------------------------------|-------------------------------------------------------------------------------------------------------------------------------------------------------------------------------------------------------------------------|-----------------|--------------|---------------------------------------------------------------------------------------------|
| Manuscript Information | Citation                                | Full citation APA style                                                                                                                                                                                                 |                 |              |                                                                                             |
|                        | DoP                                     | Publication year (print version)                                                                                                                                                                                        |                 |              |                                                                                             |
|                        | DOI                                     | Digital object identifier                                                                                                                                                                                               |                 |              |                                                                                             |
|                        | Meta-Analysis Type                      | Experimental = ES targets the difference between conditions manipulated experimentally.<br>Group differences = ES targets the difference between groups.<br>Correlation = ES targets the association between variables. |                 |              |                                                                                             |
| Background Information | Received Funding                        | Reported whether the MA received funding                                                                                                                                                                                |                 |              | Footnote funding source(s)                                                                  |
|                        | Protocol or registered?                 | Reported whether the MA follows a protocol or is registered                                                                                                                                                             |                 |              |                                                                                             |
| Eligibility Criteria   | Eligibility - Population                | Defined characteristics of eligible population                                                                                                                                                                          |                 |              | Eligible participant population                                                             |
|                        | Eligibility - Design                    | Defined types of study designs included                                                                                                                                                                                 |                 |              | Eligible research design features (e.g., random assignment only, minimal sample size)       |
|                        | Eligibility - Intervention/Manipulation | Defined intervention or manipulation (not eligible for correlational studies or group differences)                                                                                                                      |                 |              |                                                                                             |
|                        | Eligibility - Predictors                | Defined predictors (not eligible for experimental studies)                                                                                                                                                              |                 |              | Operational characteristics of independent (predictor) and dependent (outcomes) variable(s) |
|                        | Eligibility - Outcomes                  | Defined outcome variables                                                                                                                                                                                               |                 |              | Operational characteristics of independent (predictor) and dependent (outcomes) variable(s) |

|                                 |                                  |                                                                                                                                                                                                                                                                                                                             |                                                                                                                                                                                                                                                                                                                                                                                                                                                                                                                                                                                                                                                |                                                 |
|---------------------------------|----------------------------------|-----------------------------------------------------------------------------------------------------------------------------------------------------------------------------------------------------------------------------------------------------------------------------------------------------------------------------|------------------------------------------------------------------------------------------------------------------------------------------------------------------------------------------------------------------------------------------------------------------------------------------------------------------------------------------------------------------------------------------------------------------------------------------------------------------------------------------------------------------------------------------------------------------------------------------------------------------------------------------------|-------------------------------------------------|
|                                 | Eligibility - Publication status | Explicitly reported whether unpublished studies were included; coded as "yes" if the analysis included data for published versus unpublished studies                                                                                                                                                                        | Those "who have the goal of making summary claims about a particular relationship, hypothesis, or treatment will be expected to conduct thorough searches to locate both published and unpublished research. Deviations from the exhaustive search strategy will require convincing justification." (p. 6)                                                                                                                                                                                                                                                                                                                                     |                                                 |
| Search Procedures               | Provided databases searched      | <p>Provided an exhaustive list of databases searched</p> <ul style="list-style-type: none"> <li>• How the studies summarized were located;</li> <li>• Databases searched</li> <li>• Journals searched</li> <li>• Research registers consulted</li> <li>• Steps taken to retrieve "fugitive literature." (p. 184)</li> </ul> | <p>“Sampling is as important for literature reviews as it is for empirical investigations” (p. 513) and authors must:</p> <ul style="list-style-type: none"> <li>• clearly state means of obtaining the literature</li> <li>• and gather the most representative sampling of investigations possible (e.g., PsycINFO or Google Scholar lists; systematic scouring of reference lists of extant articles; means of probing unpublished works... or combinations thereof).</li> </ul> <p>Authors may also</p> <ul style="list-style-type: none"> <li>• probe colleagues and/or relevant authors for research from unpublished reports</li> </ul> | Reference and citation databases searched       |
|                                 | Provided search terms            | Provided an exhaustive list of search terms for at least one database                                                                                                                                                                                                                                                       |                                                                                                                                                                                                                                                                                                                                                                                                                                                                                                                                                                                                                                                | Keywords used to enter databases and registries |
|                                 | Provided search dates            | Reported search dates                                                                                                                                                                                                                                                                                                       |                                                                                                                                                                                                                                                                                                                                                                                                                                                                                                                                                                                                                                                |                                                 |
|                                 | Contacted authors                | Explicitly reported contacting authors for additional studies                                                                                                                                                                                                                                                               |                                                                                                                                                                                                                                                                                                                                                                                                                                                                                                                                                                                                                                                |                                                 |
| Screening and Coding Procedures | Discussed abstract screening     | Reported the abstract screening process                                                                                                                                                                                                                                                                                     |                                                                                                                                                                                                                                                                                                                                                                                                                                                                                                                                                                                                                                                |                                                 |
|                                 | Discussed FT screening           | Reported the full text screening process                                                                                                                                                                                                                                                                                    |                                                                                                                                                                                                                                                                                                                                                                                                                                                                                                                                                                                                                                                |                                                 |
|                                 | Discussed coding process         | Reported the coding process                                                                                                                                                                                                                                                                                                 | <ul style="list-style-type: none"> <li>• Reliability of coding or rating</li> <li>• Describe information recorded for each study</li> </ul>                                                                                                                                                                                                                                                                                                                                                                                                                                                                                                    |                                                 |
| Meta-analytic methods           | Defined effect size measure      | Defined which effect size measure(s) were used in the analysis                                                                                                                                                                                                                                                              |                                                                                                                                                                                                                                                                                                                                                                                                                                                                                                                                                                                                                                                |                                                 |

|                |                                             |                                                                                                                                                    |                                                                                                                         |
|----------------|---------------------------------------------|----------------------------------------------------------------------------------------------------------------------------------------------------|-------------------------------------------------------------------------------------------------------------------------|
|                | Discussed data handling                     | Described whether/how individual data points were transformed or how missing data were handled                                                     | Section on examining outliers - does not discuss how the authors should report this                                     |
|                | Discussed handling of dependent data points | Described if and how dependent data points were handled                                                                                            | Section on considering non-independence of effect sizes - does not discuss how the authors should report this           |
|                | Defined synthesis model                     | Defined which model was used (fixed versus random effects)                                                                                         | Outlines different assumptions and implications from model choice - does not discuss how the authors should report this |
|                | Defined weighting method                    | Defined how and whether model was weighted                                                                                                         |                                                                                                                         |
| Bias           | Publication bias assessed                   | Described methods used to assess publication bias                                                                                                  |                                                                                                                         |
| Search Results | Provided number found in search             | Reported the number of hits found in search or the number deemed potentially eligible for coding (without explicitly mentioning any pre-screening) |                                                                                                                         |
|                | Provided number coded                       | Reported how many papers were coded                                                                                                                | Full references for each of the studies included in the meta-analysis                                                   |

|                    |                               |                                                                                                 |                                                                                                                                                                                                                                                                                                                                                                        |
|--------------------|-------------------------------|-------------------------------------------------------------------------------------------------|------------------------------------------------------------------------------------------------------------------------------------------------------------------------------------------------------------------------------------------------------------------------------------------------------------------------------------------------------------------------|
| Summary Statistics | Sample Size                   | Reported the sample size of each study                                                          | <ul style="list-style-type: none"> <li>• Several indices of central tendency</li> <li>• Differences among these indices should be discussed and reconciled</li> <li>• Unweighted mean effect size</li> <li>• Weighted mean effect size</li> <li>• Median</li> <li>• <i>Optional</i> - proportion of studies showing effect sizes in the predicted direction</li> </ul> |
|                    | Means/sd (if applicable)      | Reported the means and SDs relevant for effect size calculations (NA for correlational studies) | <ul style="list-style-type: none"> <li>• Number of independent effect sizes on which indices are based</li> <li>• <i>Optional</i> - total number of participants on which the weighted mean is based, median number per obtained effect size</li> </ul>                                                                                                                |
|                    | Other data for ES calculation | Reported other data used for ES calculation (e.g., in the case of correlational studies)        |                                                                                                                                                                                                                                                                                                                                                                        |
|                    | Effect Size                   | Reported effect size for each study                                                             | <p>"Effect size estimates are the meta-analytic coin of the realm. Whatever else may also be recorded for each study, the estimated effect size should be recorded for each study in the meta-analysis." (p. 185)</p> <ul style="list-style-type: none"> <li>• ES distribution and central tendency</li> </ul>                                                         |

---

|                      |                                                  |                                                                                                           |                                                                                                                                                                                                                                                                                                                                                                                                                                                                                  |
|----------------------|--------------------------------------------------|-----------------------------------------------------------------------------------------------------------|----------------------------------------------------------------------------------------------------------------------------------------------------------------------------------------------------------------------------------------------------------------------------------------------------------------------------------------------------------------------------------------------------------------------------------------------------------------------------------|
|                      | Moderators used in Analyses                      | Reported moderator values for each study in enough detail that one could replicate the moderator analyses | <p>“Valuable” and “useful to readers” (p. 185):</p> <ul style="list-style-type: none"><li>• Overview of various study characteristics</li><li>• Range and median of ages used in the assembled studies</li><li>• Dates of published and unpublished studies,</li><li>• Proportion of sample participants by gender</li><li>• Proportions found in different publication formats; laboratory or field studies; randomized experiments rather than observational studies</li></ul> |
| Reproducible results | Part of data published in supplementary material | Published part of the data relevant for this list in supplementary material                               |                                                                                                                                                                                                                                                                                                                                                                                                                                                                                  |
|                      | Statistical code                                 | Published statistical code used in the analysis                                                           |                                                                                                                                                                                                                                                                                                                                                                                                                                                                                  |
